# Supplementary material for: Highly fluorescent N,S-co-doped carbon dots: synthesis and multiple applications
Source: Royal Society of Chemistry journal article supplement (doi:10.1039/c7nj00505a), 2017-01-01
Supplement: c7nj00505a1.pdf [file c7nj00505a1.pdf]

## Highly fluorescent N, S-co-doped carbon dots: synthesis and multiple applications

Jie Shen<sup>a</sup>, Ting Zhang<sup>b</sup>, Yan Cai<sup>c</sup>, Xiuying Chen<sup>a</sup>, Shaoming Shang<sup>\*a</sup>, Juan Li<sup>d</sup>

<sup>a</sup>*School of Chemical and Material Engineering, Jiangnan University, Wuxi 214122, China*

<sup>b</sup>*Institute of Cancer, Affiliated hospital of Jiangnan University, Wuxi 214122, China*

<sup>c</sup>*School of Chemistry and Chemical Engineering, Nantong University, Nantong 226019, China*

<sup>d</sup>*National Engineering Laboratory for Cereal Fermentation Technology, Jiangnan University, Wuxi 214122, China*

\*Corresponding author, E-mail: [smshangpaper@163.com](mailto:smshangpaper@163.com)

**Table S1** Quantitative comparison of chemical bonds in N, S-CDs

| Composition | Chemical bond | Bond fraction (%) | Composition | Chemical bond         | Bond fraction (%) |
|-------------|---------------|-------------------|-------------|-----------------------|-------------------|
| C 1s        | C=N/O-C=O     | 4.88              | N 1s        | C-N-C                 | 27.90             |
|             | C-O           | 9.59              |             | N=C                   | 9.80              |
|             | C-N/C-S       | 34.53             |             | N-H                   | 62.31             |
|             | C-C/C=C       | 50.99             |             |                       |                   |
| O1s         | O=C-O         | 53.17             | S 2p        | C-S 2p <sub>1/2</sub> | 46.75             |
|             | C-O-C         | 28.44             |             | C-S 2p <sub>3/2</sub> | 53.25             |
|             | C=O           | 18.39             |             |                       |                   |

**Table S2** The relationship between excitation wavelength and emission wavelength of N, S-CDs

| Excitation wavelength (nm) | 310 | 320 | 330 | 340 | 350 | 360 | 370 | 380 | 390 |
|----------------------------|-----|-----|-----|-----|-----|-----|-----|-----|-----|
| Emission Wavelength (nm)   | 421 | 431 | 446 | 461 | 465 | 472 | 487 | 506 | 519 |

**Table S3** The maximal emission wavelengths of N, S-CDs in different solvents under excitation wavelength at 360 nm

| solvent     | emission wavelength (nm) | solvent              | emission wavelength (nm) |
|-------------|--------------------------|----------------------|--------------------------|
| Water       | 450                      | Ethyl acetate        | 436                      |
| DMSO        | 432                      | Tetrahydrofuran      | 476                      |
| Methanol    | 457                      | Dichloromethane      | 428                      |
| Ethanol     | 462                      | Carbon tetrachloride | 436                      |
| Acetic acid | 420                      | Heptane              | 428                      |
| Acetone     | 422                      | Petroleum ether      | 408                      |

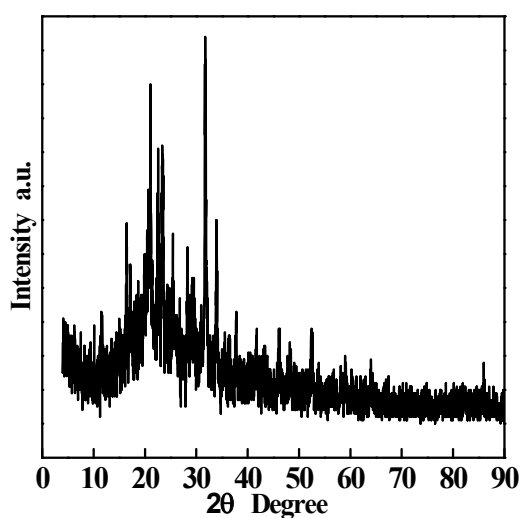**Fig. S1** XRD pattern of N, S-CDs

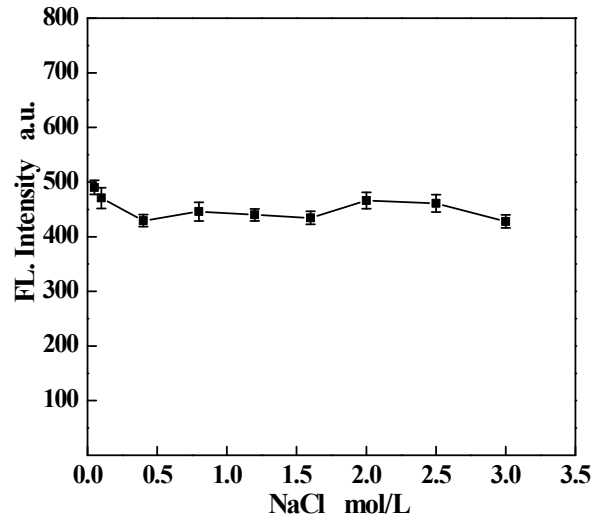

Fig. S2 Effect of NaCl concentration on fluorescent intensity of N, S-CDs

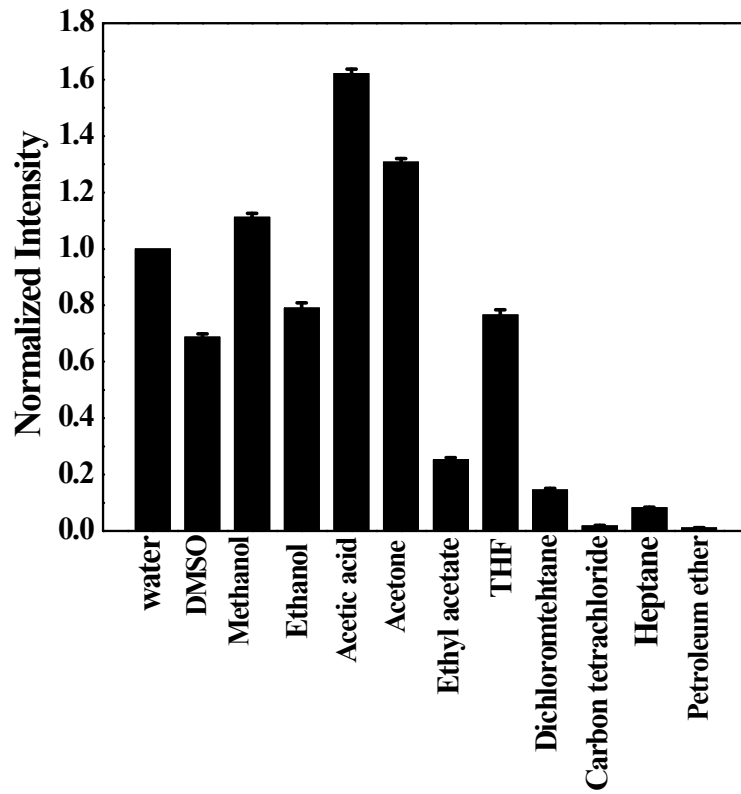

Fig. S3 Influence of different solvents on fluorescent intensity of N, S-CDs

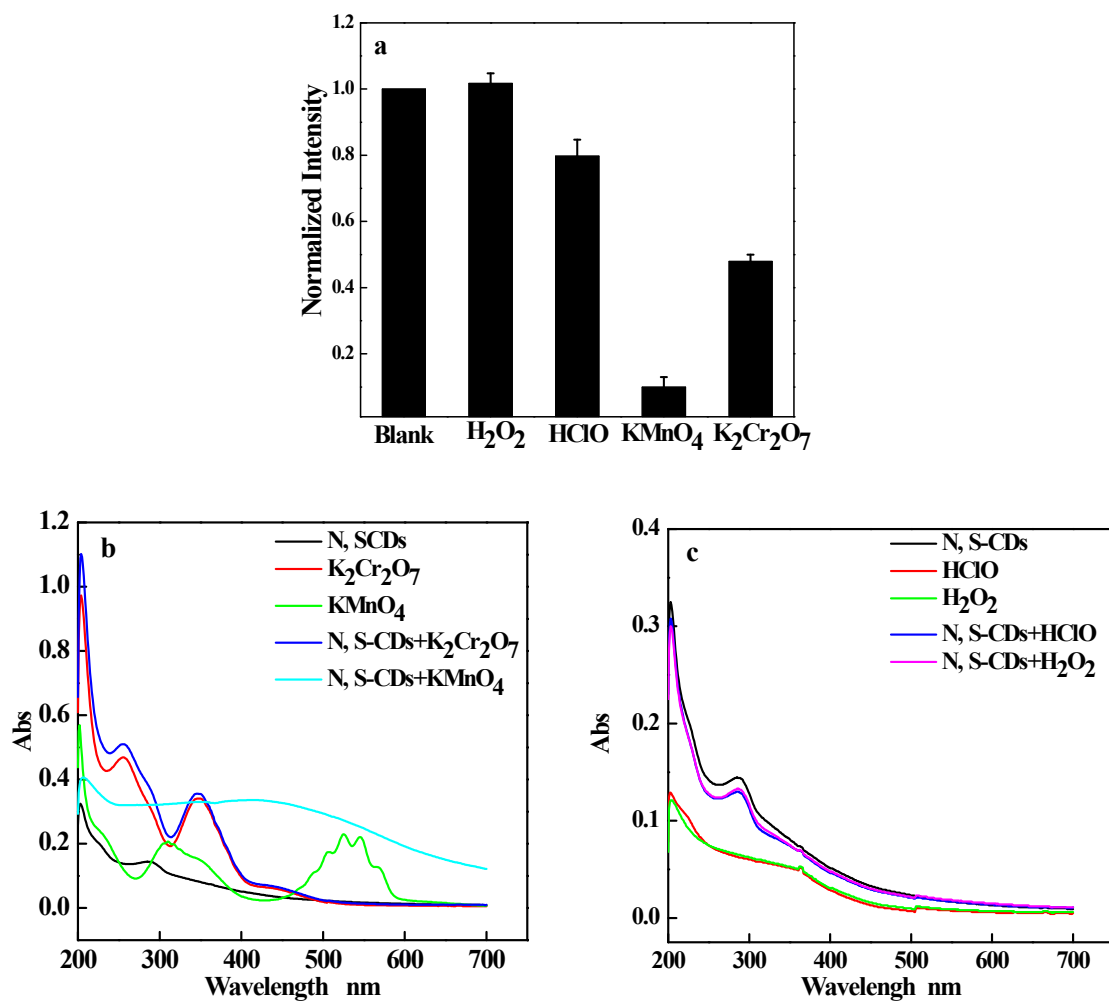

**Fig. S4** (a) Normalized fluorescence intensity of N, S-CDs upon the addition of H<sub>2</sub>O<sub>2</sub>, HClO, K<sub>2</sub>Cr<sub>2</sub>O<sub>7</sub> and KMnO<sub>4</sub>; (b) UV-vis absorption spectra of N, S-CDs, K<sub>2</sub>Cr<sub>2</sub>O<sub>7</sub>, KMnO<sub>4</sub>, N, S-CDs+ K<sub>2</sub>Cr<sub>2</sub>O<sub>7</sub>, N, S-CDs+ KMnO<sub>4</sub>; (c) UV-vis absorption spectra of N, S-CDs, HClO, H<sub>2</sub>O<sub>2</sub>, N, S-CDs+ HClO, N, S-CDs+ H<sub>2</sub>O<sub>2</sub>. The concentration of N, S-CDs was 50 µg/mL. Except the KMnO<sub>4</sub> of which concentration was 30 µM, the concentrations of other oxidants were 100 µM.

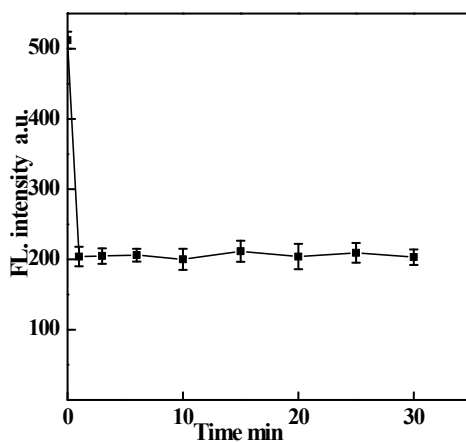

**Fig. S5** The incubation time for Cr(VI) detection versus fluorescent intensity of N,S-CDs

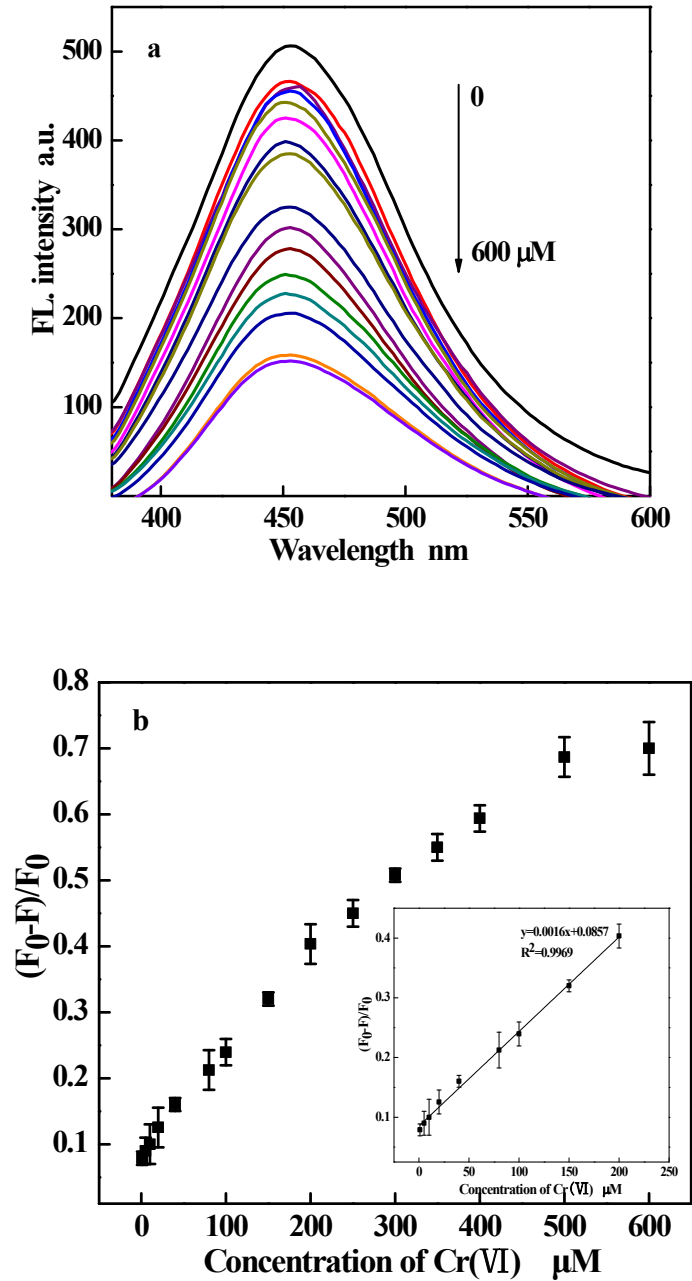

**Fig. S6** The Cr (VI) detection in Taihu lake water: (a) Fluorescence spectra of N, S-CDs( 50  $\mu$ g/mL) upon addition of different concentration of Cr (VI); (b) The relationship between  $(F_0-F)/F_0$  and concentration of Cr (VI), inset: a linear relationship with the concentration of Cr (VI) ranged from 0.5-200  $\mu$ M.

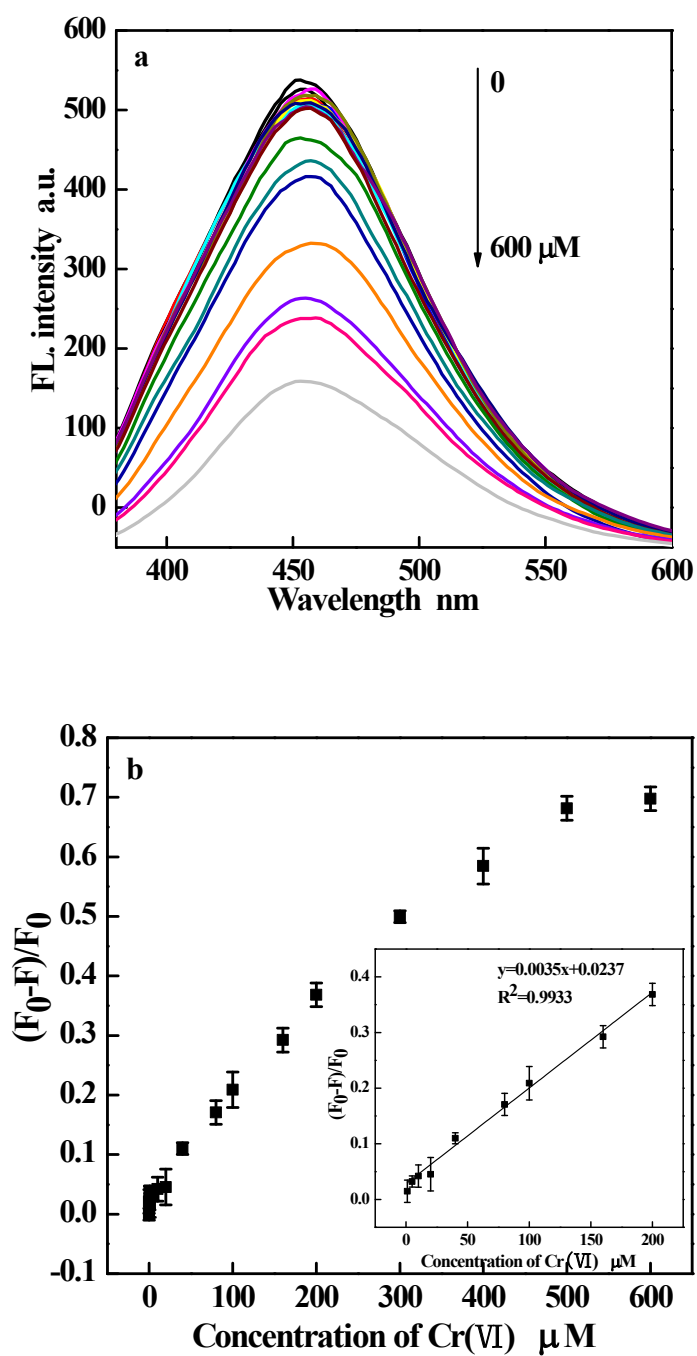

**Fig. S7** The Cr (VI) detection in human serum: (a) Fluorescence spectra of N, S-CDs( 50  $\mu\text{g}/\text{mL}$ ) upon addition of different concentration of Cr(VI); (b) The relationship between  $(F_0 - F)/F_0$  and concentration of Cr (VI), inset: a linear relationship with the concentration of Cr (VI) ranged from 0.5-200  $\mu\text{M}$ .
